# Supplementary material for: Safety Evaluations of Single Dose of the Olive Secoiridoid S-(−)-Oleocanthal in Swiss Albino Mice
Source: PubMed Central journal article supplement (PMC7071127; doi:10.3390/nu12020314), 2020-01-25
Supplement: nutrients-12-00314-s001.pdf [file nutrients-12-00314-s001.pdf]

Supporting information

# Safety Evaluations of Oral Single Dose of The Olive Secoiridoid *S*-(-)-Oleocanthal in Swiss albino Mice

Abu Bakar Siddique<sup>1</sup>, Judy Ann King<sup>2</sup>, Sharon A Meyer<sup>1</sup>, Khaldoun Abdelwahed<sup>1</sup>, Belnaser Busnena,<sup>1</sup> and Khalid El Sayed<sup>1\*</sup>

<sup>1</sup> Department of Basic Pharmaceutical and Toxicological Sciences, College of Pharmacy, University of Louisiana at Monroe, 1800 Bienville Drive, Monroe, Louisiana, siddiqab@warhawks.ulm.edu (A.B.S); meyer@ulm.edu (S.A.M.); abdelwks@warhawks.ulm.edu (A.K.); belnaser.busnena@uob.edu.ly (B.B.); elsayed@ulm.edu (K.E.S.)

<sup>2</sup> LSU Health Shreveport, Department of Pathology and Translational Pathobiology, 1501 Kings Highway, Shreveport, Louisiana, jkin12@lsuhsc.edu

\* Correspondence: elsayed@ulm.edu, Tel.: +1318-342-1725

Received: 25 December 2019; Accepted: 20 January 2020; Published: 25 January 2020

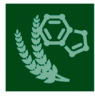

**Supplementary Table S1.** Summary of different organ histopathological evaluations and tentative toxicity scores of OC and vehicle control-treated Swiss albino mice.

| Tissue | Sex    | OC Dose (mg/kg) | Toxicity scores (n=5) | Comments                                                                                                                                       |
|--------|--------|-----------------|-----------------------|------------------------------------------------------------------------------------------------------------------------------------------------|
| Kidney | Female | Vehicle Control | 1,1,1,1,2             | 1/5 with sporadic hypochromic distal tubules                                                                                                   |
|        |        | 10 mg/kg        | 1,1,1,1,1             | 0/5 with finding                                                                                                                               |
|        |        | 250 mg/kg       | 1,1,1,2               | 1/4* with tubular dropout                                                                                                                      |
|        |        | 500 mg/kg       | 1,1,2,1,2             | 1/5 with tubular dropout                                                                                                                       |
|        | Male   | Vehicle Control | 1,1,1,1,2             | 1/5 with sporadic exfoliation of proximal tubule cells                                                                                         |
|        |        | 10 mg/kg        | 1,1,1,2,1             | 1/5 with sporadic exfoliation of proximal tubule cells                                                                                         |
|        |        | 250 mg/kg       | 1,2,2,2,2             | 2/5 with dilated distal tubules<br>1/5 with sporadic exfoliation of proximal tubule cells<br>1/5 with tubular dropout<br>1/5 with mitotic cell |
|        |        | 500 mg/kg       | 2,3,3,2,2             | 4/5 with dilated tubules<br>3/5 with vacuolated tubular cells<br>2/5 with sporadic exfoliation of tubular cells<br>1/5 with intratubular cast  |
| Heart  | Female | Vehicle Control | 1,1,1,1,1             | 0/5 with finding                                                                                                                               |
|        |        | 10 mg/kg        | 1,1,2,1,1             | 1/5 with hypochromatic foci                                                                                                                    |
|        |        | 250 mg/kg       | 2,2,3,2               | 3/4* with hypochromatic foci                                                                                                                   |
|        |        | 500 mg/kg       | 1,2,1,2,2             | 3/5 with hypochromatic foci                                                                                                                    |
|        | Male   | Vehicle Control | 1,1,2,1,1             | 1/5 with hypochromatic foci                                                                                                                    |
|        |        | 10 mg/kg        | 1,1,1,2,1             | 1/5 with hypochromatic foci                                                                                                                    |
|        |        | 250 mg/kg       | 2,1,2,1,1             | 2/5 with hypochromatic foci                                                                                                                    |
|        |        | 500 mg/kg       | 1,1,1,2,3             | 3/5 with hypochromatic foci                                                                                                                    |

**Toxicity result scores:** 1 = normal tissue, minimal pathological changes.

2 = modest pathological changes (limited alteration of specialized tissue structure and regularity, e.g., reduced white pulp, macrophage infiltration, apoptosis; red pulp hemosiderin, increased EMG; swelling; vacuolization). 3 = significant pathological changes (necrosis, hemorrhage, extensive inflammatory infiltrate, pyknosis, karyolysis, karyorrhexis).

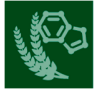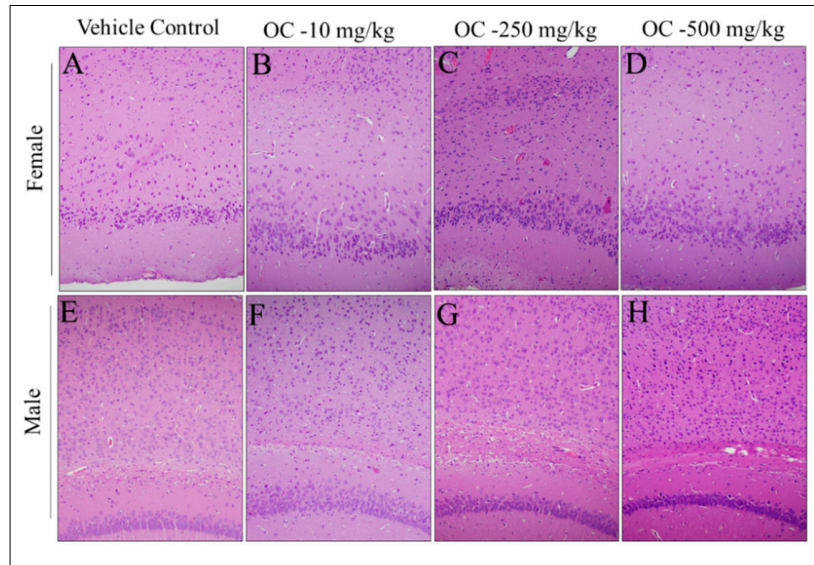

**Supplementary Figure S1-** Histopathological images of the Swiss albino mice brain sections 14 days after exposure to OC single dose treatments. (A) Female vehicle control, (B) Female OC-10 mg/kg, (C) Female OC-250 mg/kg, (D) Female OC-500 mg/kg, (E) Male vehicle control, (F) Male OC-10 mg/kg, (G) Male OC-250 mg/kg, (H) Male OC-500 mg/kg representative sections.

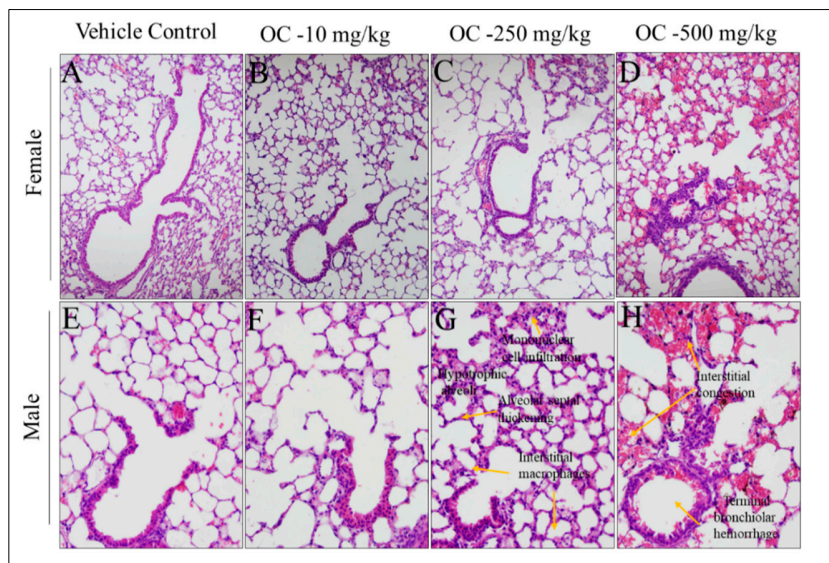

**Supplementary Figure S2-** Histopathological images of lung sections from Swiss albino mice 14 days after exposure to OC single dose treatments. (A) Female vehicle control, (B) Female OC-10 mg/kg, (C) Female OC-250 mg/kg, (D) Female OC-500 mg/kg, (E) Male vehicle control, (F) Male OC-10 mg/kg, (G) Male OC-250 mg/kg, (H) Male OC-500 mg/kg representative sections.

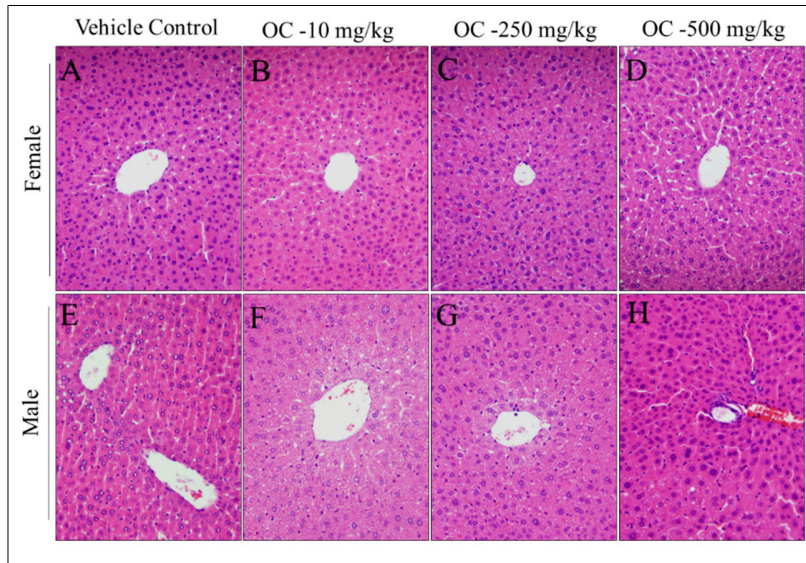

**Supplementary Figure S3-** Histopathological images of liver tissue from Swiss albino mice 14 days after exposure to OC single dose treatments. (A) Female vehicle control, (B) Female OC-10 mg/kg, (C) Female OC-250 mg/kg, (D) Female OC-500 mg/kg, (E) Male vehicle control, (F) Male OC-10 mg/kg, (G) Male OC-250 mg/kg, (H) Male OC-500 mg/kg representative sections.

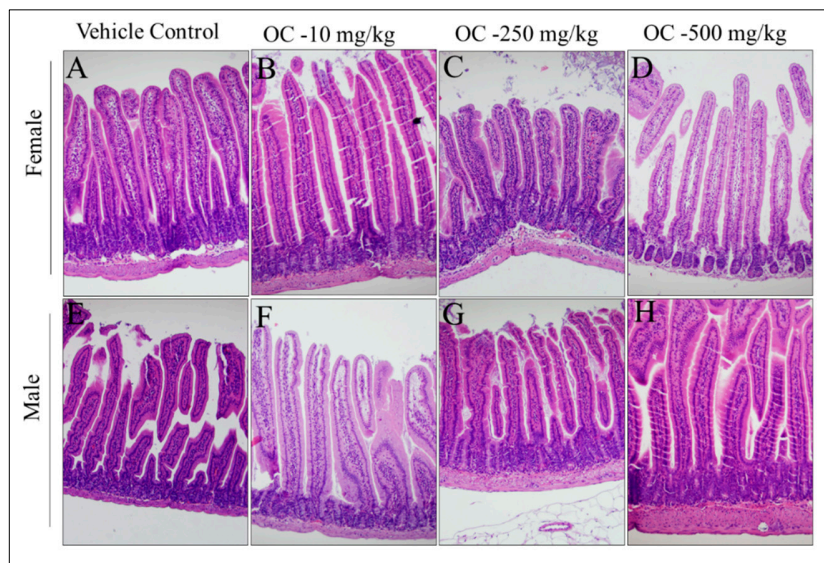

**Supplementary Figure S4-** Histopathological images of intestine tissue from Swiss albino mice 14 days after exposure to OC single dose treatments. (A) Female vehicle control, (B) Female OC-10 mg/kg, (C) Female OC-250 mg/kg, (D) Female OC-500 mg/kg, (E) Male vehicle control, (F) Male OC-10 mg/kg, (G) Male OC-250 mg/kg, (H) Male OC-500 mg/kg representative sections.

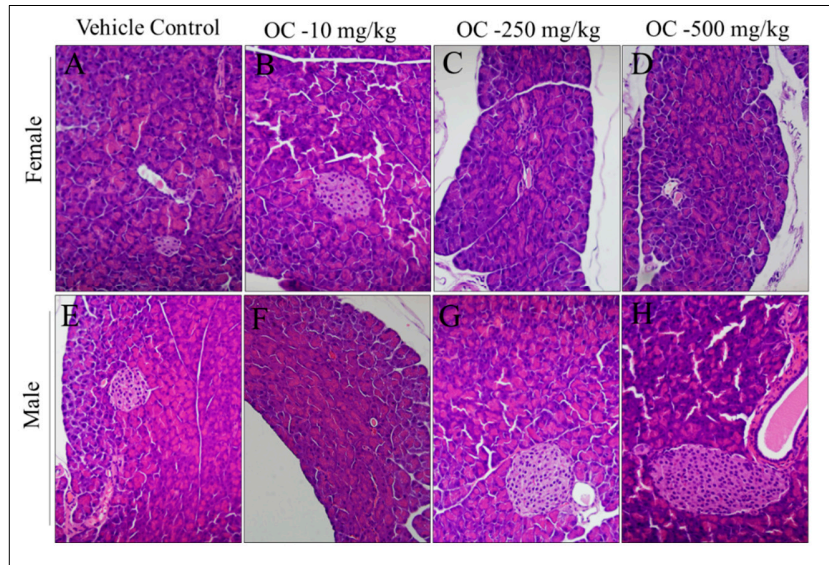

**Supplementary Figure S5-** Histopathological images of pancreas tissue from Swiss albino mice 14 days after exposure to OC single dose treatments. (A) Female vehicle control, (B) Female OC-10 mg/kg, (C) Female OC-250 mg/kg, (D) Female OC-500 mg/kg, (E) Male vehicle control, (F) Male OC-10 mg/kg, (G) Male OC-250 mg/kg, (H) Male OC-500 mg/kg representative sections.

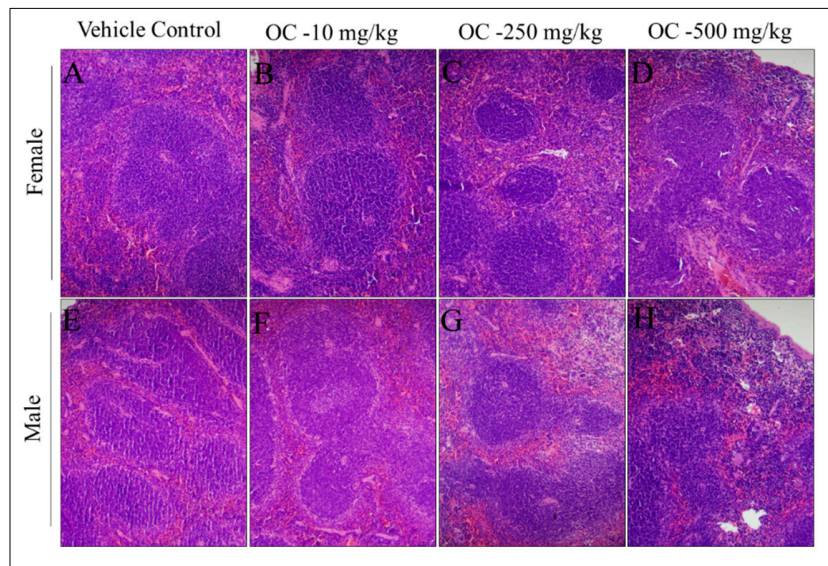

**Supplementary Figure S6-** Photomicrographs of H&E stained spleen from Swiss albino mice 14 days after exposure to OC single dose treatments. (A) Female vehicle control, (B) Female OC-10 mg/kg, (C) Female OC-250 mg/kg, (D) Female OC-500 mg/kg, (E) Male vehicle control, (F) Male OC-10 mg/kg, (G) Male OC-250 mg/kg, (H) Male OC-500 mg/kg representative sections.
